# Supplementary material for: Modelling seasonal dynamics, population stability, and pest control in Aedes japonicus japonicus (Diptera: Culicidae)
Source: Parasit Vectors. 2019 Mar 25;12:142. doi: 10.1186/s13071-019-3366-2 (PMC6434845; doi:10.1186/s13071-019-3366-2)
Supplement: Supplementary file 2 — Additional file 2: Table S5. Raw data of the hatching experiment. [file 13071_2019_3366_MOESM2_ESM.xls]

## Sheet: raw individual data
Table S5: Raw data of hatching experiment.
Egg temperature	Replicate	Individual	P day	E day	Death day	Sex	R1 length in µm
0	1	1	8	11	16	M
0	1	2	8	11	17	M
0	1	3	9	12	18	M
0	1	4	9	12	19	M
0	1	5	9	11	18	M
0	1	6	9	12	16	F
0	1	7	9	11	16	M
0	1	8	9	11	17	F
0	1	9	9	11	16	M
0	1	10	9	12	20	M
0	1	11	9	11	16	M
0	1	12	9	11	17	M
0	1	13	9	11	17	M
0	1	14	9	11	15	F
0	1	15	9	11	16	F
0	1	16	9	11	17	M
0	1	17	9	11	18	M
0	1	18	9	11	18	M
0	1	19	9	11	17	F
0	1	20	9	12	18	F
0	1	21
0	1	22	9	11	15	M
0	1	23	9 dead pupa	dead pupa	17 dead pupa	dead pupa	dead pupa
0	1	24	9	12	19	M
0	1	25	9	12	15	M
0	1	26	10	12	16	M
0	1	27	10	12	16	F
0	1	28	11	13	18	M
0	1	29	11	13	19	F
0	1	30	dead larva	dead larva	dead larva	dead larva	dead larva
0	1	31	dead larva	dead larva	dead larva	dead larva	dead larva
0	1	32	dead larva	dead larva	dead larva	dead larva	dead larva
0	1	33	dead larva	dead larva	dead larva	dead larva	dead larva
0	1	34	dead larva	dead larva	dead larva	dead larva	dead larva
0	1	35	dead larva	dead larva	dead larva	dead larva	dead larva
0	1	36	dead larva	dead larva	dead larva	dead larva	dead larva
0	1	37	dead larva	dead larva	dead larva	dead larva	dead larva
0	1	38	dead larva	dead larva	dead larva	dead larva	dead larva
0	1	39	dead larva	dead larva	dead larva	dead larva	dead larva
0	1	40	dead larva	dead larva	dead larva	dead larva	dead larva
0	2	1	8	11	17	M
0	2	2	9	11	17	M
0	2	3	9	11	16	M
0	2	4	9	11	17	M
0	2	5	9	11	17	M
0	2	6	9	11	20	F
0	2	7	9	11	18	F
0	2	8	9	11	17	M
0	2	9	9	11	19	M
0	2	10	9	11	17	M
0	2	11	9	11	16	M
0	2	12	9	11	17	F
0	2	13	9	11	17	F
0	2	14	9	11	18	M
0	2	15	9	11	18	F
0	2	16	9	11	19	M
0	2	17	9	12	17	F
0	2	18	9	12	19	F
0	2	19	9	11	20	F
0	2	20	9	12	17	F
0	2	21	9	11	17	M
0	2	22	9	12	19	F
0	2	23	9	12	18	M
0	2	24	9	12	16	F
0	2	25	9	11	19	M
0	2	26	9	11	19	M
0	2	27	10	12	16	F
0	2	28	10	12	18	F
0	2	29	11	13	19	F
0	2	30	13	15	20	F
0	2	31	14	16	20	M
0	2	32	dead larva	dead larva	dead larva	dead larva	dead larva
0	2	33	dead larva	dead larva	dead larva	dead larva	dead larva
0	2	34	dead larva	dead larva	dead larva	dead larva	dead larva
0	2	35	dead larva	dead larva	dead larva	dead larva	dead larva
0	2	36	dead larva	dead larva	dead larva	dead larva	dead larva
0	2	37	dead larva	dead larva	dead larva	dead larva	dead larva
0	2	38	dead larva	dead larva	dead larva	dead larva	dead larva
0	2	39	dead larva	dead larva	dead larva	dead larva	dead larva
0	2	40	dead larva	dead larva	dead larva	dead larva	dead larva
0	3	1	9	12	18	M
0	3	2	10	12	18	M
0	3	3	10	12	18	M
0	3	4	10	12	16	M
0	3	5	10	13	19	M
0	3	6	11	13	20	F
0	3	7	dead larva	dead larva	dead larva	dead larva	dead larva
0	3	8	dead larva	dead larva	dead larva	dead larva	dead larva
0	4	1	8	11	15	M
0	4	2	8	11	16	M
0	4	3	8	11	17	M
0	4	4	9	11	15	F
0	4	5	9	12	17	F
0	4	6	9	12	18	M
0	4	7	9	11	16	M
0	4	8	9	11	17	M
0	4	9	9	12	17	M
0	4	10	9	11	16	M
0	4	11	9	12	16	F
0	4	12	9	11	15	F
0	4	13	9	11	16	F
0	4	14	9	12	18	F
0	4	15	9	11	15	M
0	4	16	9	11	17	F
0	4	17	9	11	16	M
0	4	18	9	12	18	F
0	4	19	9	11	16	M
0	4	20	9	12	18	F
0	4	21	9	11	15	M
0	4	22	9	12	17	M
0	4	23	9	11	15	F
0	4	24	9	12	18	M
0	4	25	9	11	16	M
0	4	26	9	11	16	F
0	4	27	9	11	16	F
0	4	28	10	12	18	M
0	4	29	10	12	17	F
0	4	30	10	12	17	M
0	4	31	10	12	18	F
0	4	32	10	12	16	M
0	4	33	11	13	16	F
0	4	34	11	13	19	F
0	4	35	11	13	19	M
0	4	36	dead larva	dead larva	dead larva	dead larva	dead larva
0	4	37	dead larva	dead larva	dead larva	dead larva	dead larva
0	4	38	dead larva	dead larva	dead larva	dead larva	dead larva
0	4	39	dead larva	dead larva	dead larva	dead larva	dead larva
0	4	40	dead larva	dead larva	dead larva	dead larva	dead larva
0	5	1	8	12	18	M
0	5	2	9	12	18	M
0	5	3	9	12	19	F
0	5	4	9	13	20	F
0	5	5	9	11	16	M
0	5	6	9	12	16	M
0	5	7	9	13	18	F
0	5	8	9	12	17	M
0	5	9	9	13	18	M
0	5	10	9	12	17	M
0	5	11	9	12	15	M
0	5	12	9	12	17	F
0	5	13	9	12	17	F
0	5	14	11	13	20	F
0	5	15	11	13	18	M
0	5	16	11	13	19	F
0	5	17	12	14	19	F
0	5	18	dead larva	dead larva	dead larva	dead larva	dead larva
0	5	19	dead larva	dead larva	dead larva	dead larva	dead larva
0	5	20	dead larva	dead larva	dead larva	dead larva	dead larva
0	5	21	dead larva	dead larva	dead larva	dead larva	dead larva
0	5	22	dead larva	dead larva	dead larva	dead larva	dead larva
0	5	23	dead larva	dead larva	dead larva	dead larva	dead larva
0	5	24	dead larva	dead larva	dead larva	dead larva	dead larva
0	5	25	dead larva	dead larva	dead larva	dead larva	dead larva
0	5	26	dead larva	dead larva	dead larva	dead larva	dead larva
0	5	27	dead larva	dead larva	dead larva	dead larva	dead larva
10	1	1	9	12	19	F
10	1	2	9	11	17	F
10	1	3	9	11	15	M
10	1	4	9	11	16	F
10	1	5	9	12	17	M
10	1	6	9	11	17	F
10	1	7	9 dead pupa	dead pupa	13 dead pupa	dead pupa	dead pupa
10	1	8	9	11	19	F
10	1	9	9	12	17	F
10	1	10	9	12	19	F
10	1	11	9	12	17	F
10	1	12	9	11	15	F
10	1	13	9	11	17	M
10	1	14	9	12	18	F
10	1	15	9	11	17	M
10	1	16	9	11	17	M
10	1	17
10	1	18	9	12	16	F
10	1	19	9	12	19	M
10	1	20	9	12	18	M
10	1	21	9	12	18	F
10	1	22	9	12	18	F
10	1	23	9	11	15	F
10	1	24	9	11	16	M
10	1	25	9	11	15	M
10	1	26	9	11	15	M
10	1	27	9	11	16	M
10	1	28	10	12	19	F
10	1	29	10	12	17	F
10	1	30	10	12	18	F
10	1	31	10	12	18	F
10	1	32	10	12	17	F
10	1	33	10	12	18	F
10	1	34	10	12	18	F
10	1	35	15	18	21	F
10	1	36	dead larva	dead larva	dead larva	dead larva	dead larva
10	1	37	dead larva	dead larva	dead larva	dead larva	dead larva
10	1	38	dead larva	dead larva	dead larva	dead larva	dead larva
10	1	39	dead larva	dead larva	dead larva	dead larva	dead larva
10	1	40	dead larva	dead larva	dead larva	dead larva	dead larva
10	2	1	8	11	16	M
10	2	2
10	2	3	9	12	16	F
10	2	4	9	11	15	M
10	2	5	9	12	17	F
10	2	6	9	11	15	M
10	2	7	9	11	16	M
10	2	8	9	12	17	F
10	2	9	9	11	15	M
10	2	10	9	12	16	F
10	2	11	9	11	17	M
10	2	12	9	11	15	F
10	2	13	9	11	15	M
10	2	14	9	12	17	F
10	2	15	9	11	15	M
10	2	16	9	11	16	F
10	2	17	9	12	15	F
10	2	18
10	2	19	9	11	15	M
10	2	20	9	12	15	M
10	2	21	9	11	15	M
10	2	22	9	12	17	F
10	2	23	9	12	17	F
10	2	24	9	12	18	F
10	2	25	9	11	16	M
10	2	26	9	12	15	F
10	2	27	9	12	16	F
10	2	28	10	12	17	F
10	2	29	10	12	15	F
10	2	30	10	12	17	F
10	2	31	10	12	18	M
10	2	32	10	12	17	F
10	2	33	13	15	21	F
10	2	34	dead larva	dead larva	dead larva	dead larva	dead larva
10	2	35	dead larva	dead larva	dead larva	dead larva	dead larva
10	2	36	dead larva	dead larva	dead larva	dead larva	dead larva
10	2	37	dead larva	dead larva	dead larva	dead larva	dead larva
10	2	38	dead larva	dead larva	dead larva	dead larva	dead larva
10	2	39	dead larva	dead larva	dead larva	dead larva	dead larva
10	2	40	dead larva	dead larva	dead larva	dead larva	dead larva
10	3	1	9	11	15	M
10	3	2	9	12	18	F
10	3	3	9	12	17	M
10	3	4	9	11	15	M
10	3	5	9	12	17	F
10	3	6	9	11	15	M
10	3	7	9	12	16	M
10	3	8	9	11	17	M
10	3	9	9	12	16	M
10	3	10	9	12	18	F
10	3	11	9	11	15	M
10	3	12	9	12	16	M
10	3	13	9	11	15	M
10	3	14	9	12	18	F
10	3	15	9	12	17	F
10	3	16
10	3	17	9	11	15	M
10	3	18	9	11	16	F
10	3	19	9	11	16	M
10	3	20	9	12	17	F
10	3	21	9	11	15	M
10	3	22	9	12	17	F
10	3	23	9	12	17	F
10	3	24	9	12	17	F
10	3	25	10	12	15	M
10	3	26	10	12	18	F
10	3	27	10	12	16	F
10	3	28	10	13	17	F
10	3	29	10	12	16	F
10	3	30	10	12	17	M
10	3	31	10	12	18	F
10	3	32	10	12	18	F
10	3	33	10	12	16	F
10	3	34	11	14	17	F
10	3	35	12	15	19	M
10	3	36	dead larva	dead larva	dead larva	dead larva	dead larva
10	3	37	dead larva	dead larva	dead larva	dead larva	dead larva
10	3	38	dead larva	dead larva	dead larva	dead larva	dead larva
10	3	39	dead larva	dead larva	dead larva	dead larva	dead larva
10	3	40	dead larva	dead larva	dead larva	dead larva	dead larva
10	4	1	9	11	18	F
10	4	2	9	12	15	M
10	4	3	9	12	19	M
10	4	4	9	11	18	F
10	4	5	9	12	18	F
10	4	6	9	12	17	F
10	4	7	9	11	18	F
10	4	8	9	11	17	M
10	4	9	9	12	18	F
10	4	10	9	11	17	M
10	4	11	9	11	17	M
10	4	12	9	11	18	M
10	4	13	9	12	17	M
10	4	14	9	12	17	M
10	4	15	9	12	18	M
10	4	16	9	12	18	M
10	4	17	9	11	15	M
10	4	18	9	12	18	F
10	4	19	9	11	15	M
10	4	20	9	12	18	M
10	4	21	9	11	16	F
10	4	22	9	11	16	F
10	4	23	9	12	18	F
10	4	24	9	12	19	F
10	4	25	9	11	18	F
10	4	26	10	12	16	F
10	4	27
10	4	28	10	12	18	F
10	4	29	10	12	18	F
10	4	30	10	12	18	F
10	4	31	10	12	19	F
10	4	32	10	12	18	F
10	4	33	10	12	18	F
10	4	34	10	12	17	F
10	4	35	10	12	18	F
10	4	36	dead larva	dead larva	dead larva	dead larva	dead larva
10	4	37	dead larva	dead larva	dead larva	dead larva	dead larva
10	4	38	dead larva	dead larva	dead larva	dead larva	dead larva
10	4	39	dead larva	dead larva	dead larva	dead larva	dead larva
10	4	40	dead larva	dead larva	dead larva	dead larva	dead larva
10	5	1	9	12	18	M
10	5	2	9	11	17	M
10	5	3	9	11	16	M
10	5	4	9	11	19	F
10	5	5	9	12	19	F
10	5	6	9 dead pupa	dead pupa	13 dead pupa	dead pupa	dead pupa
10	5	7	9	11	17	M
10	5	8	9	11	18	M
10	5	9	9	12	18	F
10	5	10	9	12	18	F
10	5	11	9	12	19	F
10	5	12	9	11	17	M
10	5	13	9	11	19	F
10	5	14	9	11	16	M
10	5	15	9	11	18	M
10	5	16	9	12	19	M
10	5	17	9	11	18	M
10	5	18	9	11	16	M
10	5	19	9	12	18	M
10	5	20	9	11	18	M
10	5	21	9	12	19	F
10	5	22	9	11	18	M
10	5	23	9	11	19	F
10	5	24	9	12	18	F
10	5	25	10	12	17	F
10	5	26	10	12	18	F
10	5	27	10	12	17	F
10	5	28	10	12	17	F
10	5	29	10	12	19	F
10	5	30	10	12	17	F
10	5	31	10	12	19	F
10	5	32	10	12	19	F
10	5	33	10	12	18	M
10	5	34	11	13	15	F
10	5	35	11	13	17	F
10	5	36	11	13	17	F
10	5	37	11	13	17	M
10	5	38	11	13	19	F
10	5	39	dead larva	dead larva	dead larva	dead larva	dead larva
10	5	40	dead larva	dead larva	dead larva	dead larva	dead larva
20	1	1	8	11	15	M
20	1	2	8	11	17	M
20	1	3	8	11	17	M
20	1	4
20	1	5	8	11	16	M
20	1	6	8	11	15	M
20	1	7	9	11	17	F
20	1	8	9	12	19	F
20	1	9	9	11	15	F
20	1	10	9	11	15	F
20	1	11	9	11	17	F
20	1	12	9	11	15	M
20	1	13	9	12	17	M
20	1	14	9	11	16	M
20	1	15	9	11	16	M
20	1	16	9	12	16	F
20	1	17	9	11	17	M
20	1	18
20	1	19	9	11	16	F
20	1	20	9	11	15	F
20	1	21	9	11	18	F
20	1	22	9	11	15	M
20	1	23	9	11	15	M
20	1	24	9	11	16	M
20	1	25	9	11	16	M
20	1	26	9	11	15	F
20	1	27	9 dead pupa	dead pupa	12 dead pupa	dead pupa	dead pupa
20	1	28	9	11	15	M
20	1	29	9	12	18	F
20	1	30	9	11	15	M
20	1	31	10	13	18	F
20	1	32	10	12	19	F
20	1	33	11	13	20	F
20	1	34	11	13	18	M
20	1	35	11	13	20	F
20	1	36	11	14	18	F
20	1	37	dead larva	dead larva	dead larva	dead larva	dead larva
20	1	38	dead larva	dead larva	dead larva	dead larva	dead larva
20	1	39	dead larva	dead larva	dead larva	dead larva	dead larva
20	1	40	dead larva	dead larva	dead larva	dead larva	dead larva
20	2	1	8	11	16	M
20	2	2	8	11	15	M
20	2	3	9	11	15	F
20	2	4	9	11	18	M
20	2	5	9	11	17	F
20	2	6	9	12	17	F
20	2	7	9	11	18	M
20	2	8	9	11	17	M
20	2	9	9	12	17	M
20	2	10
20	2	11	9	11	15	M
20	2	12	9	12	19	F
20	2	13	9	11	15	M
20	2	14	9	11	18	F
20	2	15	9	12	18	F
20	2	16	9	11	19	M
20	2	17	9	12	18	F
20	2	18	9	11	16	M
20	2	19	9	11	15	M
20	2	20	9	11	17	M
20	2	21	9	11	15	F
20	2	22	9	12	18	F
20	2	23	9	12	19	F
20	2	24	9	11	16	M
20	2	25	9 dead pupa	dead pupa	13 dead pupa	dead pupa	dead pupa
20	2	26	10	12	16	F
20	2	27	10	12	15	M
20	2	28	10	12	15	M
20	2	29	10	12	17	F
20	2	30	10	12	17	M
20	2	31	10	12	17	M
20	2	32	10	12	18	F
20	2	33	10	12	16	M
20	2	34	10	12	16	F
20	2	35	11	13	18	M
20	2	36	dead larva	dead larva	dead larva	dead larva	dead larva
20	2	37	dead larva	dead larva	dead larva	dead larva	dead larva
20	2	38	dead larva	dead larva	dead larva	dead larva	dead larva
20	2	39	dead larva	dead larva	dead larva	dead larva	dead larva
20	2	40	dead larva	dead larva	dead larva	dead larva	dead larva
20	3	1	8	11	18	M
20	3	2	8	11	17	M
20	3	3	8	11	15	M
20	3	4	9	11	18	M
20	3	5	9	11	16	M
20	3	6	9	11	15	M
20	3	7	9	12	15	M
20	3	8	9	11	15	F
20	3	9	9	12	17	F
20	3	10	9	12	16	F
20	3	11	9	11	16	M
20	3	12	9	12	16	M
20	3	13	9	11	18	F
20	3	14	9	11	16	F
20	3	15	9	11	15	M
20	3	16	9	11	16	M
20	3	17	9	11	15	F
20	3	18	9	12	18	F
20	3	19	9	11	15	M
20	3	20	9	12	18	F
20	3	21	9	11	17	F
20	3	22	9	11	17	M
20	3	23	9	11	16	F
20	3	24	9	11	16	M
20	3	25	9 dead pupa	dead pupa	13 dead pupa	dead pupa	dead pupa
20	3	26	9	11	16	F
20	3	27	9	12	18	F
20	3	28	9	12	18	M
20	3	29	9	11	17	M
20	3	30	9	11	15	M
20	3	31	10	12	20	F
20	3	32
20	3	33	10	12	15	F
20	3	34	10	12	16	M
20	3	35	dead larva	dead larva	dead larva	dead larva	dead larva
20	3	36	dead larva	dead larva	dead larva	dead larva	dead larva
20	3	37	dead larva	dead larva	dead larva	dead larva	dead larva
20	3	38	dead larva	dead larva	dead larva	dead larva	dead larva
20	3	39	dead larva	dead larva	dead larva	dead larva	dead larva
20	3	40	dead larva	dead larva	dead larva	dead larva	dead larva
20	4	1	8	11	16	M
20	4	2	9	12	17	F
20	4	3	9	11	15	F
20	4	4	9	11	16	F
20	4	5	9	11	17	M
20	4	6	9	12	17	F
20	4	7	9	12	17	F
20	4	8	9	11	15	M
20	4	9	9	12	18	M
20	4	10	9	12	17	F
20	4	11	9 dead pupa	dead pupa	11 dead pupa	dead pupa	dead pupa
20	4	12	9	11	15	M
20	4	13	9	11	15	F
20	4	14	9	11	15	M
20	4	15	9	11	18	M
20	4	16	9	11	16	F
20	4	17
20	4	18	9	11	15	F
20	4	19	9	11	16	F
20	4	20	9	12	17	F
20	4	21	9	11	15	M
20	4	22	9	12	17	F
20	4	23
20	4	24	9	11	15	F
20	4	25	9	11	15	M
20	4	26
20	4	27	9	11	16	M
20	4	28	9	11	15	M
20	4	29	9	11	18	M
20	4	30	10	12	17	M
20	4	31	10	13	18	F
20	4	32	10	12	18	F
20	4	33	11	13	19	F
20	4	34	11	13	18	M
20	4	35	dead larva	dead larva	dead larva	dead larva	dead larva
20	4	36	dead larva	dead larva	dead larva	dead larva	dead larva
20	4	37	dead larva	dead larva	dead larva	dead larva	dead larva
20	4	38	dead larva	dead larva	dead larva	dead larva	dead larva
20	4	39	dead larva	dead larva	dead larva	dead larva	dead larva
20	4	40	dead larva	dead larva	dead larva	dead larva	dead larva
20	5	1	8	11	15	M
20	5	2	8	11	18	F
20	5	3	8	11	17	M
20	5	4	8	11	15	M
20	5	5	9 dead pupa	dead pupa	11 dead pupa	dead pupa	dead pupa
20	5	6	9	11	18	M
20	5	7	9	12	16	F
20	5	8	9 dead pupa	dead pupa	13 dead pupa	dead pupa	dead pupa
20	5	9	9	11	17	M
20	5	10	9	12	15	M
20	5	11	9	12	19	F
20	5	12	9	11	19	F
20	5	13	9	11	17	M
20	5	14	9	12	20	M
20	5	15	9 dead pupa	dead pupa	13 dead pupa	dead pupa	dead pupa
20	5	16	9	11	17	M
20	5	17	9	11	17	M
20	5	18	9	11	19	M
20	5	19	9	11	16	F
20	5	20	9	11	18	M
20	5	21	9	12	18	F
20	5	22	9	11	18	M
20	5	23	9	11	15	M
20	5	24	9	11	17	F
20	5	25	9	11	15	F
20	5	26	9	11	19	F
20	5	27	9	11	15	F
20	5	28	9	11	18	F
20	5	29	9	12	17	F
20	5	30	9	11	16	M
20	5	31	10	12	18	F
20	5	32	dead larva	dead larva	dead larva	dead larva	dead larva
20	5	33	dead larva	dead larva	dead larva	dead larva	dead larva
20	5	34	dead larva	dead larva	dead larva	dead larva	dead larva
20	5	35	dead larva	dead larva	dead larva	dead larva	dead larva
20	5	36	dead larva	dead larva	dead larva	dead larva	dead larva
20	5	37	dead larva	dead larva	dead larva	dead larva	dead larva
20	5	38	dead larva	dead larva	dead larva	dead larva	dead larva
20	5	39	dead larva	dead larva	dead larva	dead larva	dead larva
20	5	40	dead larva	dead larva	dead larva	dead larva	dead larva
30	1	1	8	11	15	M
30	1	2	8	11	15	F
30	1	3	8	11	18	F
30	1	4	8	11	16	F
30	1	5	9	11	19	F
30	1	6	9	12	19	F
30	1	7	9	12	18	F
30	1	8	9	12	18	F
30	1	9	9	11	17	M
30	1	10	9	11	18	F
30	1	11	9	11	17	F
30	1	12	9	11	17	M
30	1	13	9	11	17	M
30	1	14	9	11	18	F
30	1	15	9	12	19	M
30	1	16	9	12	16	M
30	1	17
30	1	18	9	11	18	F
30	1	19	9	11	18	F
30	1	20	9	11	17	M
30	1	21	9	12	16	M
30	1	22	9	12	17	M
30	1	23	9	11	18	F
30	1	24	9	11	18	M
30	1	25	9	12	18	M
30	1	26	9	12	18	F
30	1	27	10	12	18	F
30	1	28	10	12	19	F
30	1	29	10	12	18	F
30	1	30	10	12	18	F
30	1	31	11	13	18	M
30	1	32	11	13	17	M
30	1	33	11	13	19	F
30	1	34	11	13	18	F
30	1	35	11	13	18	F
30	1	36	dead larva	dead larva	dead larva	dead larva	dead larva
30	1	37	dead larva	dead larva	dead larva	dead larva	dead larva
30	1	38	dead larva	dead larva	dead larva	dead larva	dead larva
30	1	39	dead larva	dead larva	dead larva	dead larva	dead larva
30	1	40	dead larva	dead larva	dead larva	dead larva	dead larva
30	2	1	8	11	17	M
30	2	2	8	11	17	M
30	2	3	8	11	17	F
30	2	4	8	11	17	F
30	2	5	8	11	15	M
30	2	6	8	10	15	M
30	2	7	8	11	17	M
30	2	8	8	11	18	M
30	2	9	8	10	16	M
30	2	10
30	2	11
30	2	12	8	11	16	M
30	2	13	8	11	16	F
30	2	14	8	11	15	F
30	2	15
30	2	16	8	11	17	M
30	2	17	8	11	15	F
30	2	18	8	10	16	M
30	2	19	8	10	15	M
30	2	20	8	11	16	F
30	2	21	8	11	17	M
30	2	22	9	11	17	F
30	2	23	9	11	15	F
30	2	24	9	11	16	M
30	2	25	9	11	16	M
30	2	26	9	12	18	M
30	2	27	9	11	15	F
30	2	28	9	11	16	M
30	2	29	9	11	15	M
30	2	30
30	2	31	9	12	17	M
30	2	32	9	11	16	M
30	2	33	9	11	15	M
30	2	34	9	11	17	M
30	2	35	10	12	18	M
30	2	36	11	13	19	F
30	2	37	11	13	17	F
30	2	38	dead larva	dead larva	dead larva	dead larva	dead larva
30	2	39	dead larva	dead larva	dead larva	dead larva	dead larva
30	2	40	dead larva	dead larva	dead larva	dead larva	dead larva
30	3	1	8	11	19	F
30	3	2	8	10	16	M
30	3	3	8	11	18	F
30	3	4	8	11	17	F
30	3	5	8	11	15	F
30	3	6	8	11	15	F
30	3	7	9	11	16	F
30	3	8	9	12	17	F
30	3	9	9	11	17	F
30	3	10	9	11	17	M
30	3	11	9	11	16	M
30	3	12	9	11	18	M
30	3	13	9	12	18	F
30	3	14	9	11	17	M
30	3	15	9	12	17	F
30	3	16	9	12	18	F
30	3	17	9	11	17	F
30	3	18	9	11	18	M
30	3	19	9	11	16	F
30	3	20	9 dead pupa	dead pupa	10 dead pupa	dead pupa	dead pupa
30	3	21	9	12	18	M
30	3	22	9	11	15	M
30	3	23	9	11	18	M
30	3	24	9	11	17	F
30	3	25	9	11	17	F
30	3	26	9	11	16	M
30	3	27	9	11	15	M
30	3	28	9	11	16	F
30	3	29	9	12	17	F
30	3	30	9	12	17	M
30	3	31	10	13	18	M
30	3	32	10	12	16	F
30	3	33	11	14	18	F
30	3	34	11	13	19	M
30	3	35	11	13	20	F
30	3	36	dead larva	dead larva	dead larva	dead larva	dead larva
30	3	37	dead larva	dead larva	dead larva	dead larva	dead larva
30	3	38	dead larva	dead larva	dead larva	dead larva	dead larva
30	3	39	dead larva	dead larva	dead larva	dead larva	dead larva
30	3	40	dead larva	dead larva	dead larva	dead larva	dead larva
30	4	1	8	11	16	F
30	4	2	8	11	16	M
30	4	3	8	11	15	F
30	4	4	8	11	15	F
30	4	5	8	11	16	M
30	4	6	8	11	17	M
30	4	7
30	4	8	8	11	15	F
30	4	9	9	11	17	M
30	4	10	9	12	18	F
30	4	11	9	12	17	M
30	4	12	9	11	17	M
30	4	13	9	11	15	F
30	4	14	9	11	15	F
30	4	15	9	11	16	M
30	4	16	9	11	16	F
30	4	17	9	11	16	M
30	4	18	9	11	15	M
30	4	19	9	11	15	F
30	4	20	9	11	16	F
30	4	21	9	11	16	F
30	4	22	9	11	16	F
30	4	23	9	12	16	F
30	4	24	9	11	16	F
30	4	25	9	12	16	F
30	4	26	9	11	16	M
30	4	27	9	12	18	M
30	4	28	10	12	17	F
30	4	29	11	13	19	F
30	4	30
30	4	31	dead larva	dead larva	dead larva	dead larva	dead larva
30	4	32	dead larva	dead larva	dead larva	dead larva	dead larva
30	4	33	dead larva	dead larva	dead larva	dead larva	dead larva
30	4	34	dead larva	dead larva	dead larva	dead larva	dead larva
30	4	35	dead larva	dead larva	dead larva	dead larva	dead larva
30	4	36	dead larva	dead larva	dead larva	dead larva	dead larva
30	4	37	dead larva	dead larva	dead larva	dead larva	dead larva
30	4	38	dead larva	dead larva	dead larva	dead larva	dead larva
30	4	39	dead larva	dead larva	dead larva	dead larva	dead larva
30	4	40	dead larva	dead larva	dead larva	dead larva	dead larva
30	5	1	8	11	15	M
30	5	2	8	11	15	F
30	5	3	8	10	15	M
30	5	4	8	11	16	M
30	5	5	8	11	18	M
30	5	6	8	10	15	M
30	5	7	8	11	15	F
30	5	8	8	11	17	M
30	5	9	8	10	18	M
30	5	10	8	11	16	M
30	5	11	8	11	16	F
30	5	12	8	11	16	F
30	5	13	8	10	16	F
30	5	14
30	5	15	8	11	18	F
30	5	16	8	11	18	F
30	5	17
30	5	18	9	11	17	F
30	5	19	9	11	15	F
30	5	20	9	11	15	F
30	5	21	9	11	15	M
30	5	22	9 dead pupa	dead pupa	13 dead pupa	dead pupa	dead pupa
30	5	23	9	11	15	M
30	5	24	9	11	15	F
30	5	25	9	11	15	F
30	5	26	9	12	17	F
30	5	27	9	11	15	M
30	5	28	9	12	19	F
30	5	29	9	11	15	F
30	5	30	9	11	16	F
30	5	31	9	11	17	F
30	5	32	9	11	15	F
30	5	33	9	11	16	F
30	5	34	9	11	17	F
30	5	35	10	12	16	F
30	5	36	10	12	16	F
30	5	37	10	12	17	F
30	5	38	12	14	18	F
30	5	39	dead larva	dead larva	dead larva	dead larva	dead larva
30	5	40	dead larva	dead larva	dead larva	dead larva	dead larva
